# Supplementary material
Source: Springer Nature journal article supplement (https://www.springermedizin.de/resource/supplementary/12955_2012_939_MOESM1_ESM.pdf/9558856)
Supplement: MOESM1 [file 9558856]

Appendix 1: List of medications included in the definition of antidepressant treatment.

| <b>Subclass</b>                                          | <b>Medication</b>                                                                                                                                                                                                         |
|----------------------------------------------------------|---------------------------------------------------------------------------------------------------------------------------------------------------------------------------------------------------------------------------|
| Selective serotonin reuptake inhibitors (SSRIs)          | citalopram<br>escitalopram<br>fluoxetine<br>fluvoxamine<br>paroxetine<br>sertraline                                                                                                                                       |
| Serotonin and norepinephrine reuptake inhibitors (SNRIs) | desvenlafaxine<br>duloxetine<br>venlafaxine                                                                                                                                                                               |
| Tricyclic antidepressants (TCAs) and related compounds   | amitriptyline<br>amitriptyline/chlordiazepoxide<br>amitriptyline/perphenazine<br>amoxapine<br>clomipramine<br>desipramine<br>doxepin<br>imipramine / imipramine pamoate<br>nortriptyline<br>protriptyline<br>trimipramine |
| Monoamine oxidase inhibitors (MAO-Is)                    | isocarboxazid<br>phenelzine<br>tranylcypromine                                                                                                                                                                            |
| Other antidepressants                                    | nefazodone<br>trazodone<br>mirtazapine<br>maprotiline<br>bupropion SR<br>bupropion XL<br>bupropion                                                                                                                        |
